# Supplementary material for: The role of sp2/sp3 hybrid carbon regulation in the nonlinear optical properties of graphene oxide materials
Source: Royal Society of Chemistry journal article supplement (doi:10.1039/c7ra10505c), 2017-01-01
Supplement: c7ra10505c1.pdf [file c7ra10505c1.pdf]

## Supplementary information

- Flow chart of the experimental procedure for preparing GO-X (X=6, 8, 10 and 12) and Y-rGO-6 (Y=80, 100, 120, 140, 160 and 180).

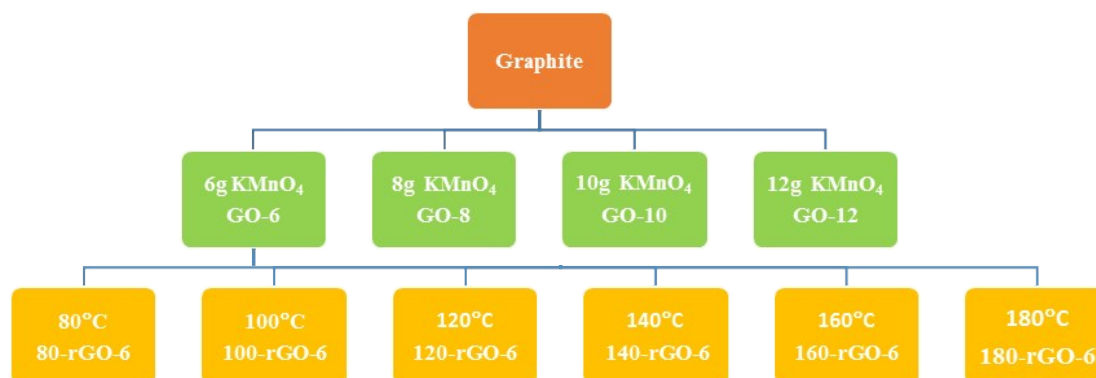

**Scheme S1** Flow chart of the experimental procedure

- The Raman spectroscopy

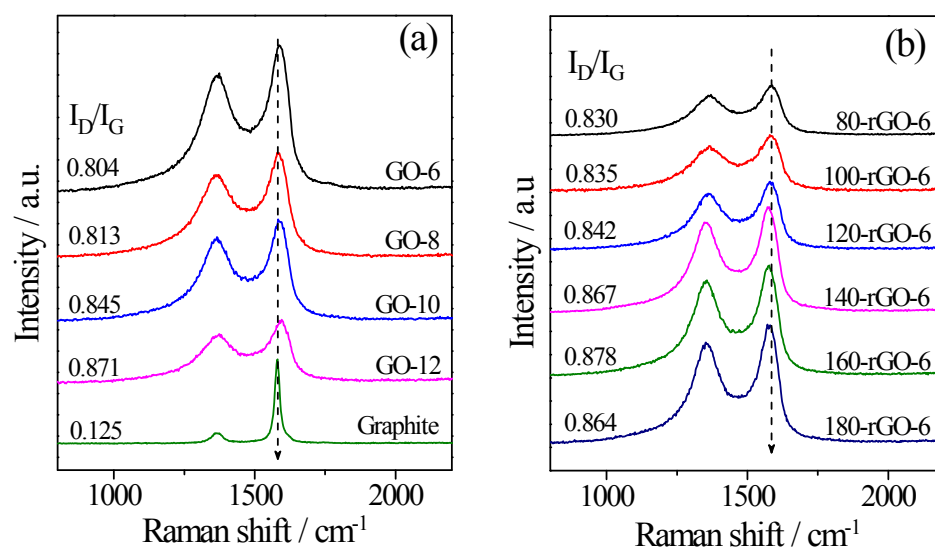

**Fig. S1** Raman spectra of GO-X (X=6, 8, 10 and 12) and Y-rGO-6 (Y=80, 100, 120, 140, 160 and 180).
